# Supplementary material
Source: MDPI journal article supplement (https://www.mdpi.com/2071-1050/14/3/1613)
Supplement: s1 [file s1]

**Table S1** The relative abundance of the dominant phyla in soils across different soil layers and reclaimed times.

| Soil depths/Reclaimed times | 0-20 cm      |              |              | 20-40 cm     |              |              |
|-----------------------------|--------------|--------------|--------------|--------------|--------------|--------------|
|                             | Time 0       | Time 1       | Time 2       | Time 0       | Time 1       | Time 2       |
| Proteobacteria              | 50.61±1.02 b | 51.91±0.63 b | 58.68±0.81 a | 48.59±2.14 A | 47.44±2.43 A | 53.07±3.07 A |
| Acidobacteria               | 10.62±0.83 a | 7.44±0.23 b  | 6.10±0.20 b  | 15.25±1.38 A | 8.70±1.08 B  | 9.91±0.29 B  |
| Gemmatimonadetes            | 10.25±0.79 a | 2.66±0.24 b  | 1.65±0.19 b  | 10.30±1.99 A | 3.74±0.60 B  | 6.01±1.33 AB |
| Bacteroidetes               | 8.54±0.79 ab | 10.53±0.55 a | 7.69±0.33 b  | 2.98±0.49 B  | 8.09±1.40 A  | 2.90±0.84 B  |
| Chloroflexi                 | 4.36±0.58 b  | 9.46±0.72 a  | 8.22±0.30 a  | 6.71±0.48 A  | 9.48±0.96 A  | 7.78±1.19 A  |
| Planctomycetes              | 5.13±0.16 a  | 3.17±0.03 b  | 3.53±0.10 b  | 4.43±0.36 A  | 3.73±0.33 A  | 4.12±0.49 A  |
| Nitrospirae                 | 0.57±0.11 a  | 1.29±0.35 a  | 1.22±0.21 a  | 1.72±0.25 A  | 2.75±1.14 A  | 3.94±0.73 A  |
| Actinobacteria              | 3.59±0.19 a  | 2.04±0.29 b  | 3.96±0.46 a  | 2.24±0.33 A  | 2.20±0.42 A  | 2.02±0.17 A  |
| Firmicutes                  | 0.18±0.07 b  | 2.71±0.05 a  | 2.06±0.28 a  | 0.14±0.07 A  | 1.94±0.86 A  | 0.91±0.04 A  |
| WS3                         | 1.76±0.18 a  | 0.70±0.08 b  | 0.57±0.02 b  | 1.30±0.17 A  | 1.06±0.02 A  | 1.22±0.42 A  |

Values are means ± SE. Different lowercase and uppercase letters indicate significant differences among different reclamation times at 0-20 and 20-40 cm depth, respectively ( $p < 0.05$ ).

**Table S2** The relative abundance of the dominant class (top 20) in soils across different soil layers and reclaimed times.

| Layer/Reclaimed sites | 0-20 cm      |               |               | 20-40 cm     |               |              |
|-----------------------|--------------|---------------|---------------|--------------|---------------|--------------|
|                       | Time 0       | Time 1        | Time 2        | Time 0       | Time 1        | Time 2       |
| Gammaproteobacteria   | 24.10±1.16 a | 20.45±0.53 b  | 22.13±0.53 ab | 19.42±1.03 A | 16.35±2.77 A  | 16.90±1.39 A |
| Deltaproteobacteria   | 7.80±0.95 b  | 12.26±1.82 ab | 15.02±1.17 a  | 12.80±0.53 A | 16.43±1.51 AB | 20.33±0.21 A |
| Alphaproteobacteria   | 15.48±0.82 a | 6.91±0.26 b   | 8.82±1.32 b   | 14.14±1.16 A | 7.20±0.53 B   | 11.43±0.91 A |
| Betaproteobacteria    | 2.53±0.07 b  | 11.98±1.01 a  | 11.90±1.51 a  | 1.39±0.50 A  | 6.94±2.88 A   | 3.78±2.26 A  |
| Anaerolineae          | 2.96±0.46 b  | 8.44±0.84 a   | 7.25±0.43 a   | 4.35±0.51 A  | 8.03±0.83 AB  | 6.34±1.01 B  |
| Nitrospira            | 0.57±0.11 a  | 1.29±0.35 a   | 1.22±0.21 a   | 1.72±0.25 A  | 2.75±1.14 A   | 3.94±0.73 A  |
| Gemm-2                | 4.59±0.18 a  | 0.66±0.18 b   | 0.55±0.12 b   | 3.28±0.63 A  | 0.85±0.06 B   | 1.03±0.11 B  |
| Rhodothermi           | 3.86±0.57 a  | 1.07±0.30 b   | 0.40±0.15 b   | 1.69±0.42 A  | 0.83±0.27 AB  | 0.23±0.01 B  |
| Sva0725               | 2.77±0.59 a  | 1.86±0.20 a   | 1.29±0.26 a   | 4.49±0.40 A  | 1.91±0.79 B   | 2.28±0.42 B  |
| Bacteroidia           | 0.00±0.00 b  | 3.23±0.65 a   | 2.58±0.51 a   | 0.01±0.01 A  | 2.56±1.17 A   | 0.63±0.24 A  |
| Flavobacteriia        | 2.32±0.17 a  | 2.68±0.79 a   | 2.88±0.70 a   | 0.27±0.17 B  | 2.69±0.27 A   | 1.22±0.26 B  |
| Gemm-5                | 2.38±0.42 a  | 0.77±0.16 b   | 0.17±0.13 b   | 1.84±0.90 A  | 0.54±0.17 A   | 0.22±0.07 A  |
| Phycisphaerae         | 1.82±0.24 a  | 1.94±0.10 a   | 1.96±0.13 a   | 2.68±0.33 A  | 2.63±0.32 A   | 2.50±0.32 A  |
| Cytophagia            | 1.37±0.14 a  | 1.98±0.41 a   | 1.32±0.17 a   | 0.63±0.18 A  | 1.11±0.02 A   | 0.59±0.31 A  |
| Acidobacteria-6       | 1.67±0.30 a  | 1.83±0.18 a   | 1.31±0.22 a   | 2.07±0.24 A  | 1.59±0.15 A   | 2.05±0.33 A  |
| Gemm-4                | 1.35±0.11 a  | 0.32±0.04 b   | 0.21±0.07 b   | 1.96±0.22 A  | 0.75±0.23 A   | 1.23±0.52 A  |
| Gemm-1                | 0.94±0.07 a  | 0.48±0.12 a   | 0.56±0.12 a   | 1.21±0.14 A  | 0.80±0.18 A   | 1.84±0.41 A  |
| Actinobacteria        | 0.51±0.06 b  | 0.60±0.10 b   | 1.69±0.33 a   | 0.96±0.31 A  | 0.92±0.27 A   | 1.11±0.12 A  |
| OS-K                  | 0.03±0.02 b  | 0.31±0.10 b   | 0.96±0.13 a   | 0.67±0.06 A  | 1.23±0.54 A   | 1.01±0.43 A  |
| PRR-12                | 1.77±0.18 a  | 0.70±0.08 b   | 0.57±0.02 b   | 1.30±0.17 A  | 1.06±0.02 A   | 1.22±0.42 A  |

Values are means ± SE. Different lowercase and uppercase letters indicate significant differences among different reclamation times at 0-20 and 20-40 cm depth, respectively ( $p < 0.05$ ).

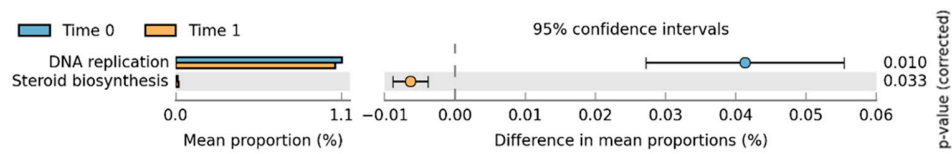

**Figure S1.** Different bacterial functional groups between Time 0 and Time 1.

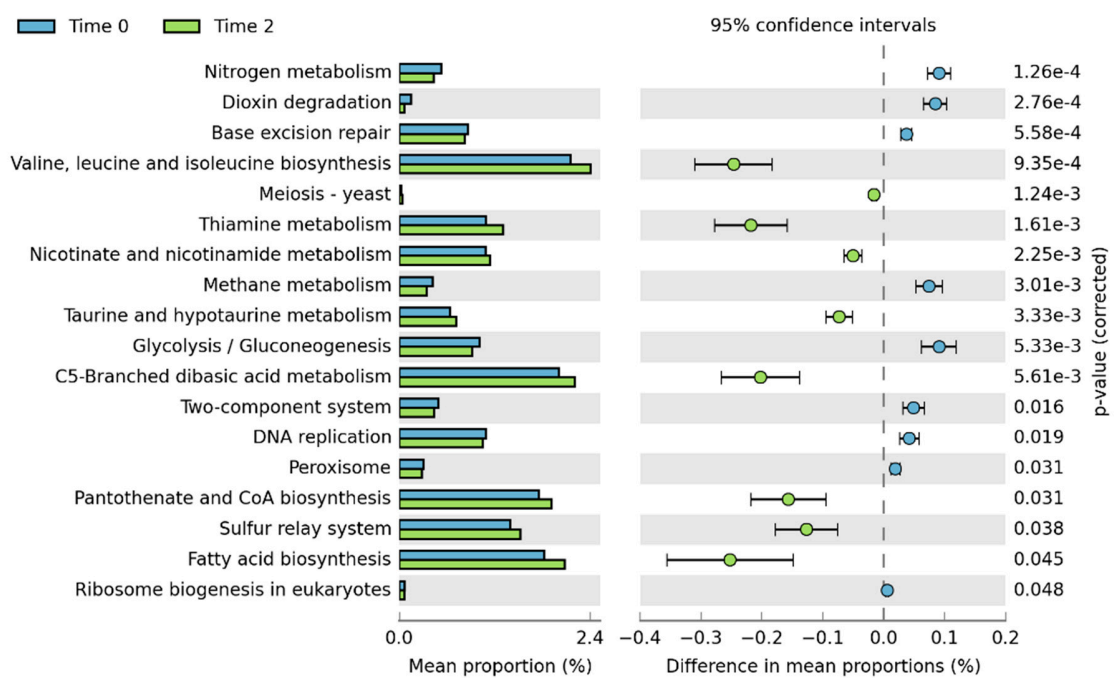

**Figure S2.** Different bacterial functional groups between Time 0 and Time 2.
